# Supplementary material
Source: MDPI journal article supplement (https://www.mdpi.com/2306-5710/10/2/35)
Supplement: s1 [file s1]

**Supplementary S1.** List of volatile compounds detected from green tea leaf samples treated with different storage temperatures (G1, G2 and G3).

| Compound<br>SL No. | Retention Time<br>(min) | Content (%) | Match Name                       | Molecular<br>Weight<br>(amu) | CAS No      |
|--------------------|-------------------------|-------------|----------------------------------|------------------------------|-------------|
| G1                 |                         |             |                                  |                              |             |
| 1                  | 1.659                   | 11.96       | Dimethyl sulfide                 | 62.019                       | 000075-18-3 |
| 2                  | 3.008                   | 2.16        | Ethyl fluoroformate              | 92.027                       | 000461-64-3 |
| 3                  | 3.237                   | 2.14        | Pentanal                         | 86.073                       | 000110-62-3 |
| 4                  | 4.318                   | 0.64        | Pentane, 1-chloro-               | 106.055                      | 000543-59-9 |
| 5                  | 4.535                   | 7.32        | 1-Pentanol                       | 88.089                       | 000071-41-0 |
| 6                  | 5.273                   | 0.39        | 2-Pentene, 4,4-dimethyl-         | 98.11                        | 026232-98-4 |
| 7                  | 5.362                   | 1.04        | Hexanal                          | 100.089                      | 000066-25-1 |
| 8                  | 6.85                    | 2.41        | 3-Hexen-1-ol                     | 100.089                      | 000544-12-7 |
| 9                  | 7.226                   | 0.93        | 1-Pentanol, 4-methyl-            | 102.104                      | 000626-89-1 |
| 10                 | 8.256                   | 0.74        | Heptanal                         | 114.104                      | 000111-71-7 |
| 11                 | 10                      | 0.36        | (S)-(+)-5-Methyl-1-heptanol      | 130.136                      | 057803-73-3 |
| 12                 | 10.229                  | 0.57        | Benzaldehyde                     | 106.042                      | 000100-52-7 |
| 13                 | 10.528                  | 0.55        | 1-Butanol, 2-methyl-, propanoate | 144.115                      | 002438-20-2 |
| 14                 | 10.712                  | 1.27        | 1-Octen-3-ol                     | 128.12                       | 003391-86-4 |
| 15                 | 10.865                  | 1.42        | 5-Hepten-2-one, 6-methyl-        | 126.104                      | 000110-93-0 |
| 16                 | 11.107                  | 0.86        | Heptane, 2,2,4,6,6-pentamethyl-  | 170.203                      | 013475-82-6 |
| 17                 | 12.474                  | 3.84        | Benzyl Alcohol                   | 108.058                      | 000100-51-6 |
| 18                 | 12.977                  | 0.46        | Benzene, ethoxy-                 | 122.073                      | 000103-73-1 |
| 19                 | 13.091                  | 0.36        | 3-Hexyne                         | 82.078                       | 000928-49-4 |

| Compound<br>SL No. | Retention Time<br>(min) | Content (%) | Match Name                                                                       | Molecular<br>Weight<br>(amu) | CAS No      |
|--------------------|-------------------------|-------------|----------------------------------------------------------------------------------|------------------------------|-------------|
| 20                 | 13.486                  | 0.42        | Cyclooctyl alcohol                                                               | 128.12                       | 000696-71-9 |
| 21                 | 13.6                    | 0.94        | 1-Octanol                                                                        | 130.136                      | 000111-87-5 |
| 22                 | 13.709                  | 0.68        | 2-Furanmethanol,<br>5-ethenyltetrahydro-.alpha.,.alpha.,5-<br>trimethyl-, cis-   | 170.131                      | 005989-33-3 |
| 23                 | 14.218                  | 1.18        | 2-Furanmethanol,<br>5-ethenyltetrahydro-.alpha.,.alpha.,5-<br>trimethyl-, trans- | 170.131                      | 034995-77-2 |
| 24                 | 14.567                  | 4.45        | 1,6-Octadien-3-ol, 3,7-dimethyl-                                                 | 154.136                      | 000078-70-6 |
| 25                 | 14.72                   | 0.92        | Cycloheptane                                                                     | 98.11                        | 000291-64-5 |
| 26                 | 14.994                  | 5.86        | Phenylethyl Alcohol                                                              | 122.073                      | 000060-12-8 |
| 27                 | 15.522                  | 0.48        | 1-Propene-1-thiol                                                                | 74.019                       | 000925-89-3 |
| 28                 | 16.915                  | 2.66        | 2H-Pyran-3-ol, 6-ethenyltetrahydro-2,2,6-<br>trimethyl-                          | 170.131                      | 014049-11-7 |
| 29                 | 17.596                  | 1.61        | Cyclohexene, 1-methyl-4-(1-<br>methylethylidene)-                                | 136.125                      | 000586-62-9 |
| 30                 | 18.181                  | 4.49        | n-Caproic acid vinyl ester                                                       | 142.099                      | 003050-69-9 |
| 31                 | 18.353                  | 0.41        | 1,6,10-Dodecatriene, 7,11-dimethyl-3-<br>methylene-, (Z)-                        | 204.188                      | 028973-97-9 |
| 32                 | 18.773                  | 0.57        | 4-Methylthiazole                                                                 | 99.014                       | 000693-95-8 |
| 33                 | 19.078                  | 7.6         | 2,6-Octadien-1-ol, 3,7-dimethyl-                                                 | 154.136                      | 000624-15-7 |
| 34                 | 19.333                  | 0.38        | Octanoic Acid                                                                    | 144.115                      | 000124-07-2 |
| 35                 | 20.382                  | 6.65        | Indole                                                                           | 117.058                      | 000120-72-9 |
| 36                 | 21.674                  | 0.42        | 1-Octyn-3-ol, 3-methyl-                                                          | 140.12                       | 023580-51-0 |

| Compound<br>SL No. | Retention Time<br>(min) | Content (%) | Match Name                                                                        | Molecular<br>Weight<br>(amu) | CAS No      |
|--------------------|-------------------------|-------------|-----------------------------------------------------------------------------------|------------------------------|-------------|
| 37                 | 23.156                  | 4.44        | 2-Cyclopenten-1-one, 3-methyl-2-(2-pentenyl)-, (Z)-                               | 164.12                       | 000488-10-8 |
| 38                 | 25.65                   | 0.52        | Phosphonofluoridic acid, methyl-, 3-methylcyclohexyl ester                        | 194.087                      | 113548-86-0 |
| 39                 | 25.981                  | 3.12        | Phenol, 2,4-bis(1,1-dimethylethyl)-                                               | 206.167                      | 000096-76-4 |
| 40                 | 26.343                  | 0.73        | tert-Butyl m-Tolyl sulfide                                                        | 180.097                      | 034786-26-0 |
| 41                 | 26.458                  | 0.47        | Naphthalene,<br>1,2,3,5,6,8a-hexahydro-4,7-dimethyl-1-(1-methylethyl)-, (1S-cis)- | 204.188                      | 000483-76-1 |
| 42                 | 27.412                  | 0.97        | 4-Amino-2,6-dihoxypyrimidine                                                      | 127.038                      | 000873-83-6 |
| 43                 | 29.467                  | 0.7         | Methyl jasmonate                                                                  | 224.141                      | 001211-29-6 |
| 44                 | 33.138                  | 0.38        | 1-Decanol, 2-ethyl-                                                               | 186.198                      | 021078-65-9 |
| 45                 | 35.689                  | 7.65        | 1H-Purine-2,6-dione, 3,7-dihydro-1,3,7-trimethyl-                                 | 194.08                       | 000058-08-2 |
| 46                 | 37.878                  | 1.85        | n-Hexadecanoic acid                                                               | 256.24                       | 000057-10-3 |
| G2                 |                         |             |                                                                                   |                              |             |
| 1                  | 1.659                   | 3.13        | Dimethyl sulfide                                                                  | 62.019                       | 000075-18-3 |
| 2                  | 3.008                   | 1.55        | Propane, 2-chloro-2-methyl-                                                       | 92.039                       | 000507-20-0 |
| 3                  | 3.237                   | 1.11        | Pentanal                                                                          | 86.073                       | 000110-62-3 |
| 4                  | 4.325                   | 1.16        | Formic acid, pentyl ester                                                         | 116.084                      | 000638-49-3 |
| 5                  | 4.541                   | 5.46        | 1-Pentanol                                                                        | 88.089                       | 000071-41-0 |
| 6                  | 5.279                   | 0.75        | 3-Penten-2-one, 4-methyl-                                                         | 98.073                       | 000141-79-7 |
| 7                  | 5.667                   | 0.72        | 1H-Pyrrole, 1-ethyl-                                                              | 95.073                       | 000617-92-5 |
| 8                  | 6.85                    | 3.45        | 3-Hexen-1-ol                                                                      | 100.089                      | 000544-12-7 |
| 9                  | 7.226                   | 0.4         | 1-Hexanol                                                                         | 102.104                      | 000111-27-3 |

| Compound<br>SL No. | Retention Time<br>(min) | Content (%) | Match Name                                                                     | Molecular<br>Weight<br>(amu) | CAS No      |
|--------------------|-------------------------|-------------|--------------------------------------------------------------------------------|------------------------------|-------------|
| 10                 | 7.359                   | 0.36        | 2,4-Octadiyne                                                                  | 106.078                      | 002809-71-4 |
| 11                 | 7.868                   | 0.46        | 2-Heptanone                                                                    | 114.104                      | 000110-43-0 |
| 12                 | 10.235                  | 2.27        | Benzaldehyde                                                                   | 106.042                      | 000100-52-7 |
| 13                 | 10.718                  | 1.34        | 1-Octen-3-ol                                                                   | 128.12                       | 003391-86-4 |
| 14                 | 10.865                  | 1.99        | 5-Hepten-2-one, 6-methyl-                                                      | 126.104                      | 000110-93-0 |
| 15                 | 11.113                  | 0.82        | Heptane, 2,2,4,6,6-pentamethyl-                                                | 170.203                      | 013475-82-6 |
| 16                 | 11.965                  | 0.37        | Benzene, 1,3-dichloro-                                                         | 145.969                      | 000541-73-1 |
| 17                 | 12.474                  | 13.69       | Benzyl Alcohol                                                                 | 108.058                      | 000100-51-6 |
| 18                 | 12.971                  | 0.77        | Phenol, 4-amino-3-methyl-                                                      | 123.068                      | 002835-99-6 |
| 19                 | 13.473                  | 0.57        | Heptanoic acid                                                                 | 130.099                      | 000111-14-8 |
| 20                 | 13.588                  | 1.3         | 3,5-Octadien-2-one                                                             | 124.089                      | 038284-27-4 |
| 21                 | 14.211                  | 0.84        | 2-Furanmethanol,<br>5-ethenyltetrahydro-.alpha.,.alpha.,5-<br>trimethyl-, cis- | 170.131                      | 005989-33-3 |
| 22                 | 14.567                  | 5           | 1,6-Octadien-3-ol, 3,7-dimethyl-                                               | 154.136                      | 000078-70-6 |
| 23                 | 14.72                   | 0.83        | Nonanal                                                                        | 142.136                      | 000124-19-6 |
| 24                 | 14.994                  | 17.03       | Phenylethyl Alcohol                                                            | 122.073                      | 000060-12-8 |
| 25                 | 16.438                  | 0.76        | 2-Nonenal, (E)-                                                                | 140.12                       | 018829-56-6 |
| 26                 | 16.909                  | 2.17        | 2H-Pyran-3-ol, 6-ethenyltetrahydro-2,2,6-<br>trimethyl-                        | 170.131                      | 014049-11-7 |
| 27                 | 18.175                  | 4.94        | n-Caproic acid vinyl ester                                                     | 142.099                      | 003050-69-9 |
| 28                 | 18.327                  | 0.79        | 1-Cyclohexene-1-carboxaldehyde, 2,6,6-<br>trimethyl-                           | 152.12                       | 000432-25-7 |
| 29                 | 18.773                  | 0.49        | 4-Methylthiazole                                                               | 99.014                       | 000693-95-8 |

| Compound<br>SL No. | Retention Time<br>(min) | Content (%) | Match Name                                                                        | Molecular<br>Weight<br>(amu) | CAS No      |
|--------------------|-------------------------|-------------|-----------------------------------------------------------------------------------|------------------------------|-------------|
| 30                 | 19.072                  | 6.55        | 4-Hexen-1-ol, 5-methyl-2-(1-methylethenyl)-, (R)-                                 | 154.136                      | 000498-16-8 |
| 31                 | 20.376                  | 2.34        | Indole                                                                            | 117.058                      | 000120-72-9 |
| 32                 | 21.674                  | 0.49        | 1-Butene, 2,3-dimethyl-                                                           | 84.094                       | 000563-78-0 |
| 33                 | 22.215                  | 0.35        | 2(3H)-Furanone, dihydro-5-propyl-                                                 | 128.084                      | 000105-21-5 |
| 34                 | 23.15                   | 4.16        | 2-Cyclopenten-1-one, 3-methyl-2-(2-pentenyl)-, (Z)-                               | 164.12                       | 000488-10-8 |
| 35                 | 25.396                  | 0.59        | 3-Buten-2-one, 4-(2,6,6-trimethyl-1-cyclohexen-1-yl)-                             | 192.151                      | 014901-07-6 |
| 36                 | 25.974                  | 2.07        | Phenol, 2,4-bis(1,1-dimethylethyl)-                                               | 206.167                      | 000096-76-4 |
| 37                 | 26.343                  | 0.82        | 5,5,8a-Trimethyl-3,5,6,7,8,8a-hexahydro-2H-chromene                               | 180.151                      | 054344-82-0 |
| 38                 | 26.445                  | 0.57        | Naphthalene,<br>1,2,3,5,6,8a-hexahydro-4,7-dimethyl-1-(1-methylethyl)-, (1S-cis)- | 204.188                      | 000483-76-1 |
| 39                 | 26.776                  | 0.55        | 2(4H)-Benzofuranone, 5,6,7,7a-tetrahydro-4,4,7a-trimethyl-                        | 180.115                      | 015356-74-8 |
| 40                 | 27.406                  | 0.9         | 4,6(1H,5H)-Pyrimidinedione, dihydro-2-imino-                                      | 127.038                      | 004425-67-6 |
| 41                 | 29.467                  | 0.62        | Methyl jasmonate                                                                  | 224.141                      | 001211-29-6 |
| 42                 | 35.676                  | 5.05        | 1H-Purine-2,6-dione, 3,7-dihydro-1,3,7-trimethyl-                                 | 194.08                       | 000058-08-2 |
| 43                 | 37.871                  | 0.41        | Undecane                                                                          | 156.188                      | 001120-21-4 |
| G3                 |                         |             |                                                                                   |                              |             |
| 1                  | 1.646                   | 0.36        | Dimethyl sulfide                                                                  | 62.019                       | 000075-18-3 |

| Compound<br>SL No. | Retention Time<br>(min) | Content (%) | Match Name                                                                     | Molecular<br>Weight<br>(amu) | CAS No      |
|--------------------|-------------------------|-------------|--------------------------------------------------------------------------------|------------------------------|-------------|
| 2                  | 2.982                   | 0.69        | 1-Penten-3-ol                                                                  | 86.073                       | 000616-25-1 |
| 3                  | 3.033                   | 0.96        | Ethyl fluoroformate                                                            | 92.027                       | 000461-64-3 |
| 4                  | 3.243                   | 0.46        | Furan, 2-ethyl-                                                                | 96.058                       | 003208-16-0 |
| 5                  | 4.522                   | 0.64        | 1-Pentanol                                                                     | 88.089                       | 000071-41-0 |
| 6                  | 5.254                   | 0.68        | 3-Penten-2-one, 4-methyl-                                                      | 98.073                       | 000141-79-7 |
| 7                  | 5.642                   | 0.63        | 1H-Pyrrole, 1-ethyl-                                                           | 95.073                       | 000617-92-5 |
| 8                  | 6.151                   | 0.49        | 2-Pentenal, 2-methyl-                                                          | 98.073                       | 000623-36-9 |
| 9                  | 6.831                   | 1.87        | 3-Hexen-1-ol                                                                   | 100.089                      | 000544-12-7 |
| 10                 | 7.843                   | 0.58        | 2-Heptanone                                                                    | 114.104                      | 000110-43-0 |
| 11                 | 9.993                   | 0.35        | 2-Heptenal, (E)-                                                               | 112.089                      | 018829-55-5 |
| 12                 | 10.216                  | 6.7         | Benzaldehyde                                                                   | 106.042                      | 000100-52-7 |
| 13                 | 10.509                  | 0.85        | 2-Hexene, 3,5,5-trimethyl-                                                     | 126.141                      | 026456-76-8 |
| 14                 | 10.706                  | 1.57        | 1-Octen-3-ol                                                                   | 128.12                       | 003391-86-4 |
| 15                 | 10.852                  | 2.3         | 5-Hepten-2-one, 6-methyl-                                                      | 126.104                      | 000110-93-0 |
| 16                 | 11.088                  | 0.89        | 2-Decen-1-ol, (E)-                                                             | 156.151                      | 018409-18-2 |
| 17                 | 11.749                  | 0.47        | 2,4-Heptadienal, (E,E)-                                                        | 110.073                      | 004313-03-5 |
| 18                 | 12.468                  | 15.17       | Benzyl Alcohol                                                                 | 108.058                      | 000100-51-6 |
| 19                 | 12.958                  | 1.69        | 2-Pyrazinamine, N,N-dimethyl-                                                  | 123.08                       | 005214-29-9 |
| 20                 | 13.473                  | 0.92        | Heptanoic acid                                                                 | 130.099                      | 000111-14-8 |
| 21                 | 13.575                  | 3.73        | 3,5-Octadien-2-one                                                             | 124.089                      | 038284-27-4 |
| 22                 | 14.199                  | 0.52        | 2-Furanmethanol,<br>5-ethenyltetrahydro-.alpha.,.alpha.,5-<br>trimethyl-, cis- | 170.131                      | 005989-33-3 |
| 23                 | 14.555                  | 3.48        | 1,6-Octadien-3-ol, 3,7-dimethyl-                                               | 154.136                      | 000078-70-6 |

| Compound<br>SL No. | Retention Time<br>(min) | Content (%) | Match Name                                                  | Molecular<br>Weight<br>(amu) | CAS No      |
|--------------------|-------------------------|-------------|-------------------------------------------------------------|------------------------------|-------------|
| 26                 | 15.528                  | 0.42        | 2,5-Pyrrolidinedione, 1-ethyl-                              | 127.063                      | 002314-78-5 |
| 27                 | 15.834                  | 0.38        | 7-Oxabicyclo[4.1.0]heptane, 1-methyl-                       | 112.089                      | 001713-33-3 |
| 28                 | 16.451                  | 0.88        | Octanoic Acid                                               | 144.115                      | 000124-07-2 |
| 29                 | 16.902                  | 1.33        | 2H-Pyran-3-ol, 6-ethenyltetrahydro-2,2,6-trimethyl-         | 170.131                      | 014049-11-7 |
| 30                 | 17.583                  | 1.43        | 3-Cyclohexene-1-methanol,<br>.alpha.,.alpha.4-trimethyl-    | 154.136                      | 000098-55-5 |
| 31                 | 18.168                  | 3.49        | n-Caproic acid vinyl ester                                  | 142.099                      | 003050-69-9 |
| 32                 | 18.321                  | 0.79        | 1-Cyclohexene-1-carboxaldehyde, 2,6,6-trimethyl-            | 152.12                       | 000432-25-7 |
| 33                 | 18.766                  | 0.65        | 4-Methylthiazole                                            | 99.014                       | 000693-95-8 |
| 34                 | 19.065                  | 5.15        | 2,6-Octadien-1-ol, 3,7-dimethyl-, (E)-                      | 154.136                      | 000106-24-1 |
| 35                 | 19.352                  | 0.48        | Nonanoic acid                                               | 158.131                      | 000112-05-0 |
| 36                 | 20.37                   | 3.02        | Indole                                                      | 117.058                      | 000120-72-9 |
| 37                 | 23.143                  | 3.75        | 2-Cyclopenten-1-one, 3-methyl-2-(2-pentenyl)-, (Z)-         | 164.12                       | 000488-10-8 |
| 38                 | 23.926                  | 0.42        | 1,3-Cyclohexadiene, 1-methyl-4-(1-methylethyl)-             | 136.125                      | 000099-86-5 |
| 39                 | 24.499                  | 0.49        | 5,9-Undecadien-2-one, 6,10-dimethyl-, (Z)-                  | 194.167                      | 003879-26-3 |
| 40                 | 25.396                  | 1.74        | 3-Buten-2-one, 4-(2,6,6-trimethyl-1-cyclohexen-1-yl)-, (E)- | 192.151                      | 000079-77-6 |

| Compound<br>SL No. | Retention Time<br>(min) | Content (%) | Match Name                                                              | Molecular<br>Weight<br>(amu) | CAS No      |
|--------------------|-------------------------|-------------|-------------------------------------------------------------------------|------------------------------|-------------|
| 41                 | 25.478                  | 0.97        | 3-Buten-2-one, 4-(2,2,6-trimethyl-7-oxabicyclo[4.1.0]hept-1-yl)-        | 208.146                      | 023267-57-4 |
| 42                 | 25.968                  | 1.72        | Phenol, 2,4-bis(1,1-dimethylethyl)-                                     | 206.167                      | 000096-76-4 |
| 43                 | 26.184                  | 0.35        | 2H-Pyran-2-carboxaldehyde, 3,4-dihydro-                                 | 112.052                      | 000100-73-2 |
| 44                 | 26.337                  | 1.93        | 1,3-Benzenediol, 5-pentyl-                                              | 180.115                      | 000500-66-3 |
| 45                 | 26.77                   | 3.23        | 2(4H)-Benzofuranone, 5,6,7,7a-tetrahydro-4,4,7a-trimethyl-,<br><br>(R)- | 180.115                      | 017092-92-1 |
| 46                 | 27.4                    | 0.44        | 4-Amino-2,6-dihydroxypyrimidine                                         | 127.038                      | 000873-83-6 |
| 47                 | 29.448                  | 0.49        | Methyl jasmonate                                                        | 224.141                      | 001211-29-6 |
| 48                 | 35.677                  | 3.76        | 1H-Purine-2,6-dione, 3,7-dihydro-1,3,7-trimethyl-                       | 194.08                       | 000058-08-2 |
| 49                 | 37.878                  | 0.43        | n-Hexadecanoic acid                                                     | 256.24                       | 000057-10-3 |



**Supplementary S2.** Sensory evaluation scores of green tea samples at different storage conditions (G1, G2 and G3)

| Conditions | Appearance          | Score | Aroma                 | Score | Soup color             | Score | Taste            | Score | Leaf bottom                             | Score | Overall ratings |
|------------|---------------------|-------|-----------------------|-------|------------------------|-------|------------------|-------|-----------------------------------------|-------|-----------------|
| G1         | emerald green, oily | 90    | Tender and refreshing | 92    | yellow green clear     | 92    | Fresh and mellow | 92    | greener and brighter                    | 92    | 91.5            |
| G2         | yellow, drier       | 75    | Alcoholic             | 78    | light green yellow     | 75    | Alcoholic        | 75    | Bright yellow and green                 | 78    | 76.05           |
| G3         | yellow, drier       | 72    | smelly, stuffy        | 65    | yellowish still bright | 65    | slightly bitter  | 60    | Yellow-green to yellowish, still bright | 70    | 65.75           |

\*The scoring standard for sensory evaluation is: 25 points for Appearance; 10 points for soup color; 25 points for aroma; 30 points for taste; 10 points for leaf bottom, and the total score is 100 points.
